# Supplementary material for: Thymic macrophages consist of two populations with distinct localization and origin
Source: eLife. 2022 Nov 30;11:e75148. doi: 10.7554/eLife.75148 (PMC9754631; doi:10.7554/eLife.75148)
Supplement: Figure 1—figure supplement 4—source data 1. [file elife-75148-fig1-figsupp4-data1.xlsx]

## Sheet: Sheet1
Fig. 1S5	% ThyMacs among SIRPa+ DCs
	23.6
	25.3
	27.6
	27.5
	23.7
Figure 1 – figure supplement 4: Example flow cytometry plots showing that gating on CD11c+MHC2+ thymus cells, in addition to DCs, also includes macrophages, especially among SIRPa+ cells. On the right is a plot of the frequency of MerTK+ cells among CD11c+MHC2+SIRPa+ cells. The data are mean±SEM from 5 individual mice. Each dot is an individual mouse. The numbers in the flow cytometry plots are t…
