# Supplementary material for: Thymic macrophages consist of two populations with distinct localization and origin
Source: eLife. 2022 Nov 30;11:e75148. doi: 10.7554/eLife.75148 (PMC9754631; doi:10.7554/eLife.75148)
Supplement: Figure 1—source data 1. [file elife-75148-fig1-data1.xlsx]

## Sheet: Sheet1
Fig. 1G	% of all cells		number x105			Fig. 1H	% of all cells									number x105
	0.13		429000			weeks of age	4	5	6	7	8	9	10	11		weeks of age	4	5	6	7	8	9	10	11
	0.092		188600				0.12	0.13	0.022	0.13	0.14	0.11	0.084	0.13			444000	475475	148500	497250	728000	467500	310254	429000
	0.11		176000				0.15	0.16	0.14	0.091	0.16	0.11	0.092	0.092			748125	167200	589050	649740	472000	388080	287776	188600
	0.12		444000				0.11	0.086	0.18	0.088	0.093	0.15	0.11	0.11			505505	379260	337500	359040	207483	682500	213180	176000
	0.13		475475				0.089	0.11	0.16	0.092	0.042	0.053	0.11	0.077			645873	420750	626080	367080	70308	106530	314820	171864
	0.16		167200				0.16	0.11	0.14	0.063	0.19	0.083	0.085	0.11			486160	467500	301840	272538	608000	260744	217005	455400
	0.13		497250				0.12	0.095	0.11	0.087	0.062	0.13	0.13				502980	319200	534435	122018	221774	360750	456950
	0.022		148500					0.11	0.094	0.1	0.15	0.12	0.11					433125	482690	275900	567450	433260	154000
	0.14		589050					0.1	0.13	0.13	0.16	0.099	0.08					445000	580450	298350	535040	333878	224360
	0.086		379260					0.11		0.1	0.094	0.11						390500		410700	390100	348480
	0.11		420750					0.076		0.11	0.093	0.09						237728		457875	282720	247050
	0.091		649740					0.16		0.1	0.07	0.089						163840		567000	171395	257922
	0.11		467500					0.13		0.019		0.073						299520		87837		189252
	0.14		728000					0.13		0.12								649350		582120
	0.16		472000					0.096		0.13								347328		679770
	0.11		388080					0.12										337560
	0.15		682500					0.089										304380
	0.11		467500					0.087										504600
	0.095		319200					0.067										238989
	0.11		433125
	0.1		445000
	0.11		390500
	0.077		171864
	0.093		207483
	0.042		70308
	0.076		237728
	0.16		163840
	0.13		299520
	0.084		310254
	0.092		287776
	0.088		359040
	0.092		367080
	0.063		272538
	0.087		122018
	0.053		106530
	0.18		337500
	0.16		626080
	0.19		608000
	0.14		301840
	0.13		649350
	0.083		260745
	0.11		213180
	0.062		221774
	0.11		314820
	0.085		217005
	0.11		455400
	0.15		748125
	0.11		505505
	0.089		645873
	0.13		360750
	0.1		275900
	0.13		298350
	0.15		567450
	0.096		347328
	0.12		337560
	0.16		535040
	0.11		534435
	0.1		410700
	0.12		433260
	0.13		456950
	0.089		304380
	0.087		504600
	0.067		238989
	0.094		482690
	0.11		457875
	0.1		567000
	0.099		333878
	0.11		348480
	0.16		486160
	0.019		87837
	0.094		390100
	0.12		582120
	0.09		247050
	0.11		154000
	0.08		224360
	0.093		282720
	0.13		580450
	0.13		679770
	0.12		502980
	0.07		171395
	0.089		257922
	0.073		189253
Figure 1. Thymic macrophages (ThyMacs) can be identified by the expression of CD64, MerTK, and F4/80.
G Average numbers and percentages of ThyMacs in 4-11 weeks old mice, n=82.
H Comparison of the numbers and percentages of ThyMacs in mice of different ages, n=82.
