# Supplementary material for: Thymic macrophages consist of two populations with distinct localization and origin
Source: eLife. 2022 Nov 30;11:e75148. doi: 10.7554/eLife.75148 (PMC9754631; doi:10.7554/eLife.75148)
Supplement: Figure 2—figure supplement 1—source data 1. [file elife-75148-fig2-figsupp1-data1.xlsx]

## Sheet: Sheet1
Fig. 2S1	% ThyMacs among SpiC-GFP+ cells
	91.5
	98.3
	97.2
Figure 2 – figure supplement 1: Example of the gating strategy to identify ThyMacs among SpicGFP+ cells. On the right is a plot showing the mean±SEM of the frequencies of ThyMacs among SpicGFP+ cells. Each dot is an individual mouse. The numbers in the flow cytometry plots are the percent of cells in the respective gate.
