# Supplementary material for: Thymic macrophages consist of two populations with distinct localization and origin
Source: eLife. 2022 Nov 30;11:e75148. doi: 10.7554/eLife.75148 (PMC9754631; doi:10.7554/eLife.75148)
Supplement: Figure 2—figure supplement 2—source data 1. [file elife-75148-fig2-figsupp2-data1.xlsx]

## Sheet: Sheet1
Fig. 2S2	% GFP+ cells among ThyMacs						%ThyMacs among GFP+
	LysM-GFP	CX3CR1-GFP	MAFIA	CD11c-YFP			LysM-GFP	CX3CR1-GFP	MAFIA	CD11c-YFP
	83	53.6	85.3	89.5			29.2	8.18	8.1	1.5
	64	39.6	88.1	91.9			46.2	19.4	30.9	17.8
	39.5	71.2	69.3	94.9			54.6	28.4	20.8	12
	64.4	52.2	83.3				46.6	17.1	29.6
Figure 2 – figure supplement 2: Representative flow cytometry plots of the expression of four reporter alleles in ThyMacs (left), frequencies of GFP/YFP+ cells among ThyMacs (middle), and frequencies of ThyMacs among GFP/YFP+ cells (right). Data in the graphs represent mean±SEM. Each dot is an individual mouse.
