# Supplementary material for: Thymic macrophages consist of two populations with distinct localization and origin
Source: eLife. 2022 Nov 30;11:e75148. doi: 10.7554/eLife.75148 (PMC9754631; doi:10.7554/eLife.75148)
Supplement: Figure 2—figure supplement 3—source data 1. [file elife-75148-fig2-figsupp3-data1.xlsx]

## Sheet: Sheet1
Fig. 2S3	%SpiC-GFP+ cells among ThyMacs																			Fig. S4g	%SpiC-GFP+ cells among ThyMacs
	74.7																				74.7
	83																				83
	79.1																				79.1
Figure 2 – figure supplement 3: Representative flow cytometry plots of the expression of SpicGFP in ThyMacs. To the right is a graph showing the mean±SEM of the frequencies of SpicGFP+ cells among ThyMacs. Each dot is an individual mouse. The numbers in the flow cytometry plots are the percent of cells in the respective gate.
