# Supplementary material for: Thymic macrophages consist of two populations with distinct localization and origin
Source: eLife. 2022 Nov 30;11:e75148. doi: 10.7554/eLife.75148 (PMC9754631; doi:10.7554/eLife.75148)
Supplement: Figure 3—source data 1. [file elife-75148-fig3-data1.xlsx]

## Sheet: Sheet1
Fig. 3B	percent divided cells				Fig. 3D	phagocytosis index			Fig. 3G	% co-localizartion with TUNEL+ signal
	ThyDCs	ThyMacs	PC Macs			ThyMacs	PC Macs			MerTK	Tim4
	74.9	44.5	8.84			13.8	13.6			86	78
	64.4	19.1	6.04			9.81	25.3			86	67
	83.3	29.3	11			9.14	34.8			84	81
	82.9	27.7	10.8			16.2	28.5
						12.7	25.6
						18	31.2
						26.3	17.9
						22.5	17.2
						15.1	18.2
						29.1	24.6
						14.6	18.9
						15.2	25.8
						12	14.4
						9.2	11.8
						8.63
						8.81
						10.8
						9.15
						6.83
						9.67
						9.58
Figure 3. Thymic macrophages can present antigens to T cells and phagocytose apoptotic cells.
B Quantification of the cell division in naïve OT2 cells by using the Cell Proliferation module in FlowJo that calculates the percent of cells from the initial population that has undergone division.
D Quantification of the percentage of macrophages that have engulfed at least one thymocyte (phagocytic index).
G Frequencies of the co-localization of TUNEL+ signal with MerTK+ and TIM4+ cells.
