# Supplementary material for: Thymic macrophages consist of two populations with distinct localization and origin
Source: eLife. 2022 Nov 30;11:e75148. doi: 10.7554/eLife.75148 (PMC9754631; doi:10.7554/eLife.75148)
Supplement: Figure 5—figure supplement 1—source data 1. [file elife-75148-fig5-figsupp1-data1.xlsx]

## Sheet: Sheet1
Fig. 5S1	percent donor-derived thymocytes
	Thymocytes - transplant	Thymocytes - endogenous
	0.039	0.00327
	2.81	0.026
	0.14	0.00447
	4.62	0.027
	0.16	0.00884
	0.45	0.00871
Figure 5 – figure supplement 1: Representative flow cytometry plots of donor (CD45.2+) vs. host (CD45.1+) derived thymocytes in the transplanted thymus. The host thymus (endogenous thymus) serves as a negative control. To the right is a graph showing the mean±SEM of the frequencies of CD45.2+ (donor-derived) cells among thymocytes in the transplanted and endogenous thymuses of the mice. Each dot …
