# Supplementary material for: Thymic macrophages consist of two populations with distinct localization and origin
Source: eLife. 2022 Nov 30;11:e75148. doi: 10.7554/eLife.75148 (PMC9754631; doi:10.7554/eLife.75148)
Supplement: Figure 5—figure supplement 2—source data 1. [file elife-75148-fig5-figsupp2-data1.xlsx]

## Sheet: Sheet1
Fig. 5S2	SpiC-GFP mean gMFI (x10^3)
	Tim4+ CD45.2+ Transplant	Tim4+ CD45.1+ Transplant	Tim4+ CD45.1+ Endogenous	Tim4- CD45.1+ Transplant	Tim4- CD45.1+ Endogenous
	6272	1301	1203	950	1146
	7162	942	1255	782	919
	7033	1019	1168	836	682
	7693	923	1637	712	1216
	6747	925	1133	737	812
Figure 5 – figure supplement 2: Comparison of the geometric mean fluorescent intensities (gMFI) of SpicGFP TIM4+ and TIM4- thymic macrophages of host and donor-origin in the transplanted thymus. The endogenous thymus serves as background control. Only populations comprising >5% of thymic macrophages are shown. Each dot is an individual mouse. The data are presented as mean±SEM.
