# Supplementary material for: Thymic macrophages consist of two populations with distinct localization and origin
Source: eLife. 2022 Nov 30;11:e75148. doi: 10.7554/eLife.75148 (PMC9754631; doi:10.7554/eLife.75148)
Supplement: Figure 5—source data 1. [file elife-75148-fig5-data1.xlsx]

## Sheet: Sheet1
Fig. 5C	% GFP+ ThyMacs				Fig. 5F	% donor-derived cells					Fig. 5I	% donor-derived cells
	E15.5	E19.5				Blood monocytes	TIM4+ ThyMacs	TIM4- ThyMacs				Tim4+ Transplant	Tim4+ Endogenous	Tim4- Transplant	Tim4- Endogenous
	73.3517	10.0951				50.7	0.28	17				77.2	0.37	3.28	2.16
	44.058	12.5942				66.6	0.65	25.1				55.8	0.93	3.77	3.28
	48.0369	6.79814				39.4	0.26	13.3				68.3	0.29	4.97	2.71
	42.8198	7.72293				81.7	3.58	51.1				77.6	2.33	1.76	3.35
	46.1917	11.1974				58.3	2.25	23.4				82.2	1.11	4.58	2.87
	48.8318	13.0032				59.8	1.22	24.6
	49.2027	13.5977				41.9	0.31	12.9
	49.434	15.6554
	61.8182	6.01974
		11.9769
		11.2808
		11.7711
		8.91061
		10.9029
		8.75158
		14.4068
Figure 5. Yolk sac (YS), non-YS-derived embryonic progenitors, and adult hematopoietic stem cells sequentially contribute to the thymic macrophage pool.
C Frequencies of GFP+ ThyMacs at E15.5 and E19.5 adjusted to the degree of labeling of microglia.
F Frequencies of donor-derived blood monocytes, TIM4+ and TIM4- ThyMacs.
I Frequencies of CD45.2+ (donor-derived) cells among TIM4+ and TIM4- ThyMacs in the transplanted and endogenous thymuses of the mice.
