# Supplementary material for: Thymic macrophages consist of two populations with distinct localization and origin
Source: eLife. 2022 Nov 30;11:e75148. doi: 10.7554/eLife.75148 (PMC9754631; doi:10.7554/eLife.75148)
Supplement: Figure 6—source data 1. [file elife-75148-fig6-data1.xlsx]

## Sheet: Sheet1
Fig. 6B	% Ki67+ cell			Fig. 6E	% EdU+ thymocytes			% EdU+ ThyMacs				Fig. 6G	% ThyMacs					Fig. 6I	Ki67 delta gMFI
	ThyMacs				21d pulse	21d chase		21d pulse	21d chase				G0/1	S	G2/M				TIM4+	TIM4-
	7.77				88.7	0.4		100	8.57				85.8	11.1	2.72				799	4158
	1.76				86.6	0.39		92.4	8.33				87.9	9.26	2.37				1402	1480
	3.23				88.2	0.43		94.2	6.67				87.8	8.04	3.4				704	5245
					87.5	0.22		90.1	0										1399	3101
					87.5	0.17		97.4	4.48										879	7019
					91.4	0.13		82.7	1.43
Figure 6. Thymic macrophages exhibit a low degree of proliferation.
B Frequency of Ki67+ thymic macrophages. C Example flow cytometry plots of the EdU accumulation in thymocytes and thymic macrophages 2 hours after 1 mg EdU i.p. or vehicle injection.
E Frequencies of EdU+ cells among thymocytes (top graph) and ThyMacs (bottom graph).
G Frequencies of ThyMacs in different stages of the cell cycle.
I Comparison of Ki67 protein expression in TIM4+ and TIM4- thymic macrophages. The expression is measured as the difference of the geometric mean fluorescent intensities of the Ki67 antibody staining and isotype control (delta gMFI).
