# Supplementary material for: Thymic macrophages consist of two populations with distinct localization and origin
Source: eLife. 2022 Nov 30;11:e75148. doi: 10.7554/eLife.75148 (PMC9754631; doi:10.7554/eLife.75148)
Supplement: Figure 7—source data 1. [file elife-75148-fig7-data1.xlsx]

## Sheet: Sheet1
Fig. 7B	E14.5				E17.5				newborn				7 d old				6 weeks old
	Tim4-	DP	CX3CR1-		Tim4-	DP	CX3CR1-		Tim4-	DP	CX3CR1-		Tim4-	DP	CX3CR1-		Tim4-	DP	CX3CR1-
	71.8	26.3	0.23		22.7	63.7	7.81		5.69	50.5	38.6		0	6.06	91.8		11.3	11	74.5
	57.3	41.6	0		24.1	61.8	9.71		4.55	47.9	43.3		0	9.33	85.3		7.61	6.09	84.3
	72.2	26.2	0.2		19.7	65.5	9.57		4.49	51.1	40.3		0.5	11.9	85.1		14.5	10.1	70
	83.1	4.76	0.95		35.1	54.3	4.96		2.1	52.4	41.3
	83.1	4.5	2.12		22.1	62.3	10.8		2.95	52.5	41.3
	78.1	6.09	1.79		18	64.2	12.9		6.31	47.2	40.9
					26.2	58.3	9.09		4.9	51	40.5
									4.57	47.2	44.7
Fig. 7C	% of ThyMacs
		Tim4-								DP								CX3CR1-
	E14.5	71.8	57.3	72.2	83.1	83.1	78.1			26.3	41.6	26.2	4.76	4.5	6.09			0.23	0	0.2	0.95	2.12	1.79
	E17.5	22.7	24.1	19.7	35.1	22.1	18	26.2		63.7	61.8	65.5	54.3	62.3	64.2	58.3		7.81	9.71	9.57	4.96	10.8	12.9	9.09
	newborn	5.69	4.55	4.49	2.1	2.95	6.31	4.9	4.57	50.5	47.9	51.1	52.4	52.5	47.2	51	47.2	38.6	43.3	40.3	41.3	41.3	40.9	40.5	44.7
	7 d old	0	0	0.5						6.06	9.33	11.9						91.8	85.3	85.1
	6 weeks old	11.3	7.61	14.5						11	6.09	10.1						74.5	84.3	70
Fig. 7D	E15.5				E19.5
	Tim4-	Tim4+			Tim4-	Tim4+
	89.011	42.3077			17.4583	12.285
	43.4783	46.3768			26.4368	8.44007
	52.6559	46.8822			21.1172	11.049
	48.3029	40.47			28.6313	7.2067
	59.2138	34.398			27.3598	8.70041
	62.3832	38.0841			14.628	11.1097
	58.9977	44.6469			34.322	11.2994
	49.0566	43.7736			30.038	9.37262
	74.5455	36.7273			26.8293	12.306
					16.2877	7.12297
					16.242	7.67516
					14.0777	11.2621
					28.4091	12.4675
					25.1451	12.205
					39.8876	15.412
					13.1579	5.52632
Fig. 7G	Tim4+Cx3cr1- among GFP+
	30.6
	30.3
	35.6
	31.6
Figure 7. Timd4+ thymic macrophages are derived from Cx3cr1+ cells during embryonic development.
B Frequencies of Timd4+Cx3cr1- (Timd4 single-positive or Timd4SP), Timd4+Cx3cr1+(double-positive or DP), and Cx3cr1+Timd4- (Cx3cr1 single-positive or Cx3cr1SP) thymic macrophages at the indicated time points.
C Kinetics of the changes in different subpopulations of thymic macrophages from E14.5 to 6 weeks.
D Frequencies at E15.5 and E19.5 of GFP-labeled cells among TIM4+ or TIM4- cells in Cx3cr1CreER X ROSA26LSL-GFP embryos treated with 4-OHT at E9.5.
G Frequencies of TIM4+CX3CR1- cells among fate-mapped GFP+ macrophages.
