# Supplementary material for: Thymic macrophages consist of two populations with distinct localization and origin
Source: eLife. 2022 Nov 30;11:e75148. doi: 10.7554/eLife.75148 (PMC9754631; doi:10.7554/eLife.75148)
Supplement: Figure 8—source data 1. [file elife-75148-fig8-data1.xlsx]

## Sheet: Sheet1
Fig. 8B	TIM4- ThyMacs					TIM4+ ThyMacs						Fig. 8D	TIM4- ThyMacs					TIM4+ ThyMacs						Fig. 8E	% TIM4- ThyMacs						Fig. 8F	TIM4- ThyMacs					TIM4+ ThyMacs
	d3 veh	d3 Tam	6 weeks veh	6 weeks Tam		d3 veh	d3 Tam	6 weeks veh	6 weeks Tam				d3 veh	d3 Tam	6 weeks veh	6 weeks Tam		d3 veh	d3 Tam	6 weeks veh	6 weeks Tam				1 week	7 weeks	4 mo	>8 mo				1 week	7 weeks	4 mo	>8 mo		1 week	7 weeks	4 mo	>8 mo
	0	14.3	4.55	7.81		0	51.2	2.87	40.1				2.7	89.8	0	26.7		1.85	25.2	0.62	27.2				0	24.5	51.2	62.3				689.43	28228	57510	49822.5		56595	359338	53250	25550
	0	26.7	0	1.89		0.27	47.7	1.31	35.7				4.55	85.9	5.81	21.4		3.66	33.2	1.45	20.4				0	36.6	56.7	66.2				992.25	32175	98039	280060		40425	340956	74971	56012
	0	55.6	0	10		0.43	47.2	0.97	39.8				5.49	77.3	3.8	45.6		1.08	25.1	3.85	34.7				0.5	24.7	54.5	82.9				1526.17	75509	89760	111384		41040	396800	76160	29835
		33.3	1.41	8.93			44.9	2.07	42.6				3.17		0	32.5		1.44		0	40.9							77.9
		12.5		8			38.7		45.9						1.02	31.4				0	43.6
				9.3			38.1		44.6						1.45	27.3				1.82	22
				10.3					47.5							29.8					51.4
				11.5					50.9
				11.9					44.7
				14.7					43.3
				12.2					40.6
				8.62					57.4
Figure 8. Timd4+ thymic macrophages are progressively lost, while Cx3cr1+ cells slowly accumulate with age.
B Frequencies of GFP+ TIM4+ or TIM4- thymic macrophages from neonatally fate-mapped mice after 3 and 42 days. Vehicle-injected nursing dam litters (Veh) served as a control for non-specific labeling.
D Frequencies of GFP+ TIM4+ or TIM4- thymic macrophages from adult fate-mapped mice after 3 and 42 days.
E Frequencies of TIM4- thymic macrophages at different ages.
F Changes in the numbers of TIM4- and TIM4+ thymic macrophages with age.
